# Supplementary material for: Evaluation and mapping of the social values for ecosystem services in the urban river landscape. Case study: Zamora and Malacatos rivers in Loja - Ecuador
Source: Research Square preprint supplement (doi:10.21203/rs.3.rs-1760343/v1), 2022-06-22

# Appendix A

## Viewing the "OpinaRíos" application on Mobile devices and computers

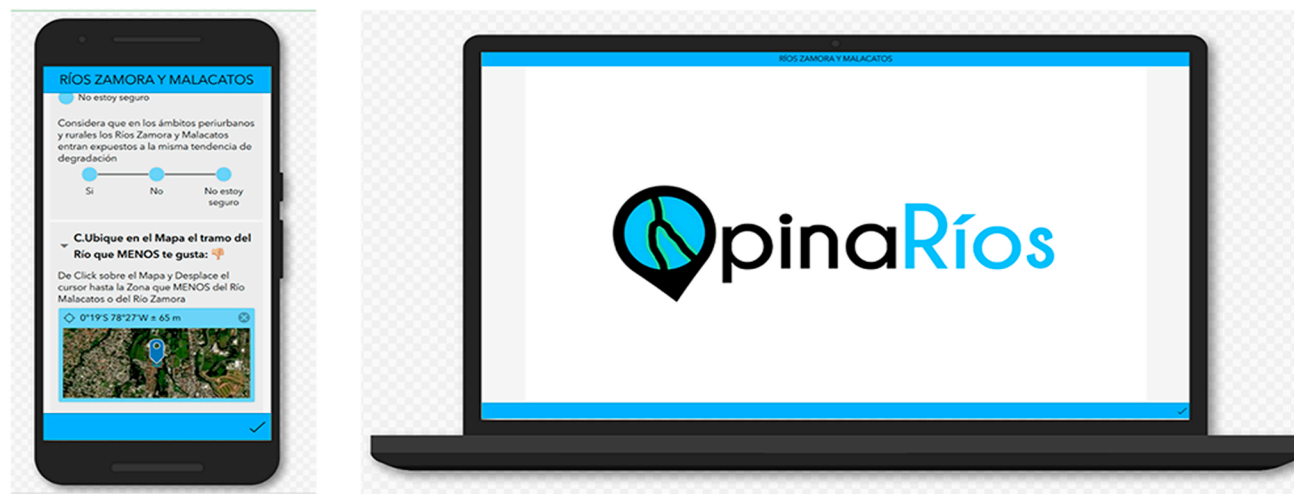

### SolVES flowchart

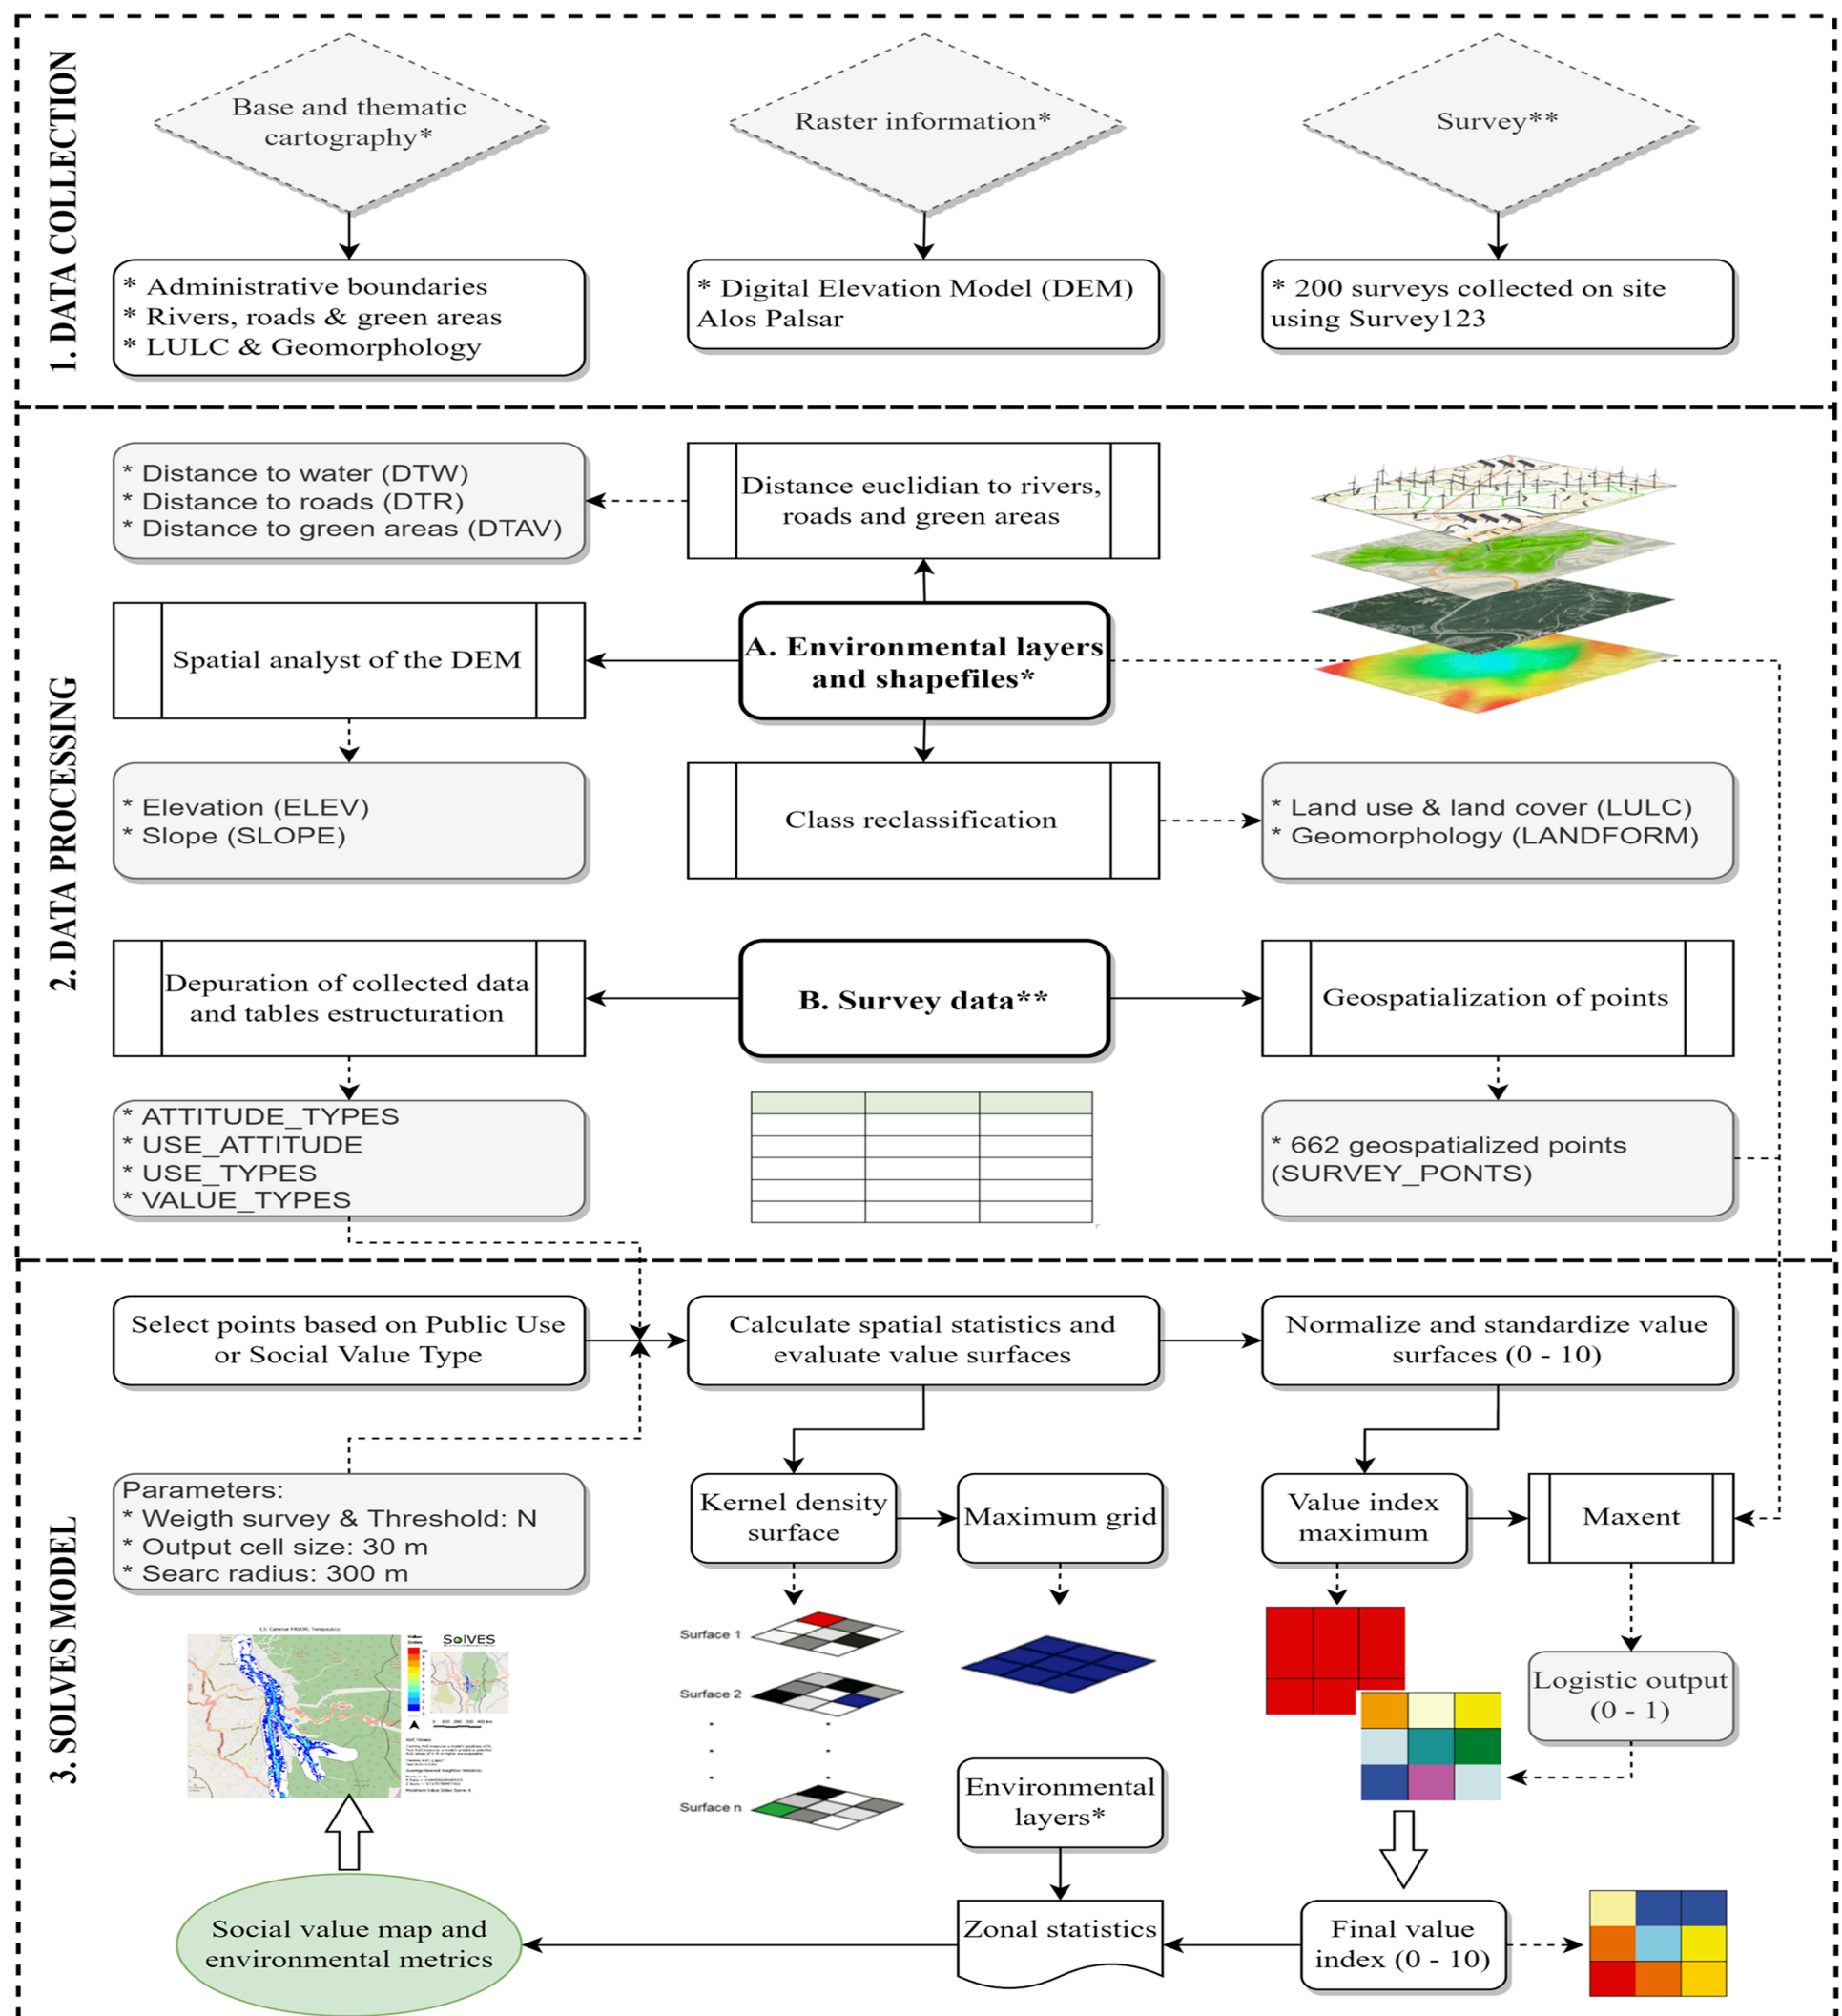

Supplement: Supplementary file 1 [file 00b837f8600f4452419d69fc.pdf]
